# Supplementary material
Source: PubMed Central journal article supplement (PMC3457781)
Supplement: NIHMS405495-supplement-Suppl_Fig.pdf [file NIHMS405495-supplement-Suppl_Fig.pdf]

## Supplementary Figure A

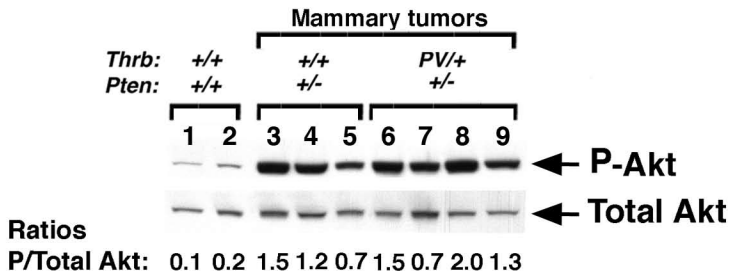

The PI3K signalling pathway is overactivated in the mammary glands of *Pten*<sup>-/-</sup> mice but is not further altered by the TRBPV mutation. Mammary gland preparation and Western blots were performed as described in *Methods*. The ratios of phosphorylated to total Akt protein levels are shown in the mammary glands of wild-type *Thrb*<sup>+/+</sup>*Pten*<sup>+/+</sup> (n=2), *Thrb*<sup>+/+</sup>*Pten*<sup>+/-</sup> (n=2) and *Thrb*<sup>PV/+</sup>*Pten*<sup>+/-</sup> mice.
